# Supplementary material
Source: PubMed Central journal article supplement (PMC6118115)
Supplement: NIHMS1500322-supplement-1.pdf [file NIHMS1500322-supplement-1.pdf]

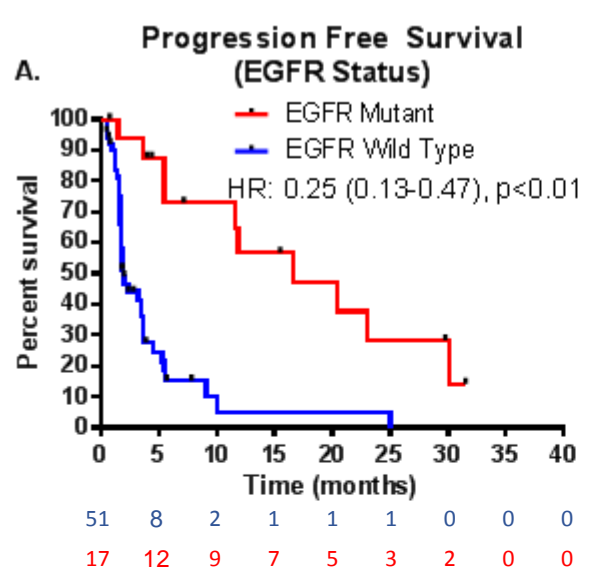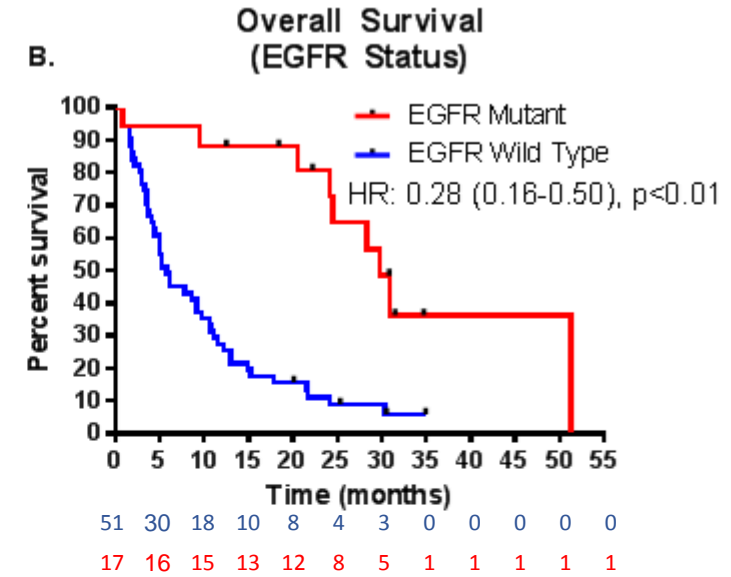

**Supplemental Figure 1.** Progression free survival (PFS) and overall survival (OS) data among subgroup analysis of EGFR status and gender. A,B) PFS and OS for by EGFR status.
