# Supplementary material
Source: PubMed Central journal article supplement (PMC6118115)
Supplement: NIHMS1500322-supplement-2.pdf [file NIHMS1500322-supplement-2.pdf]

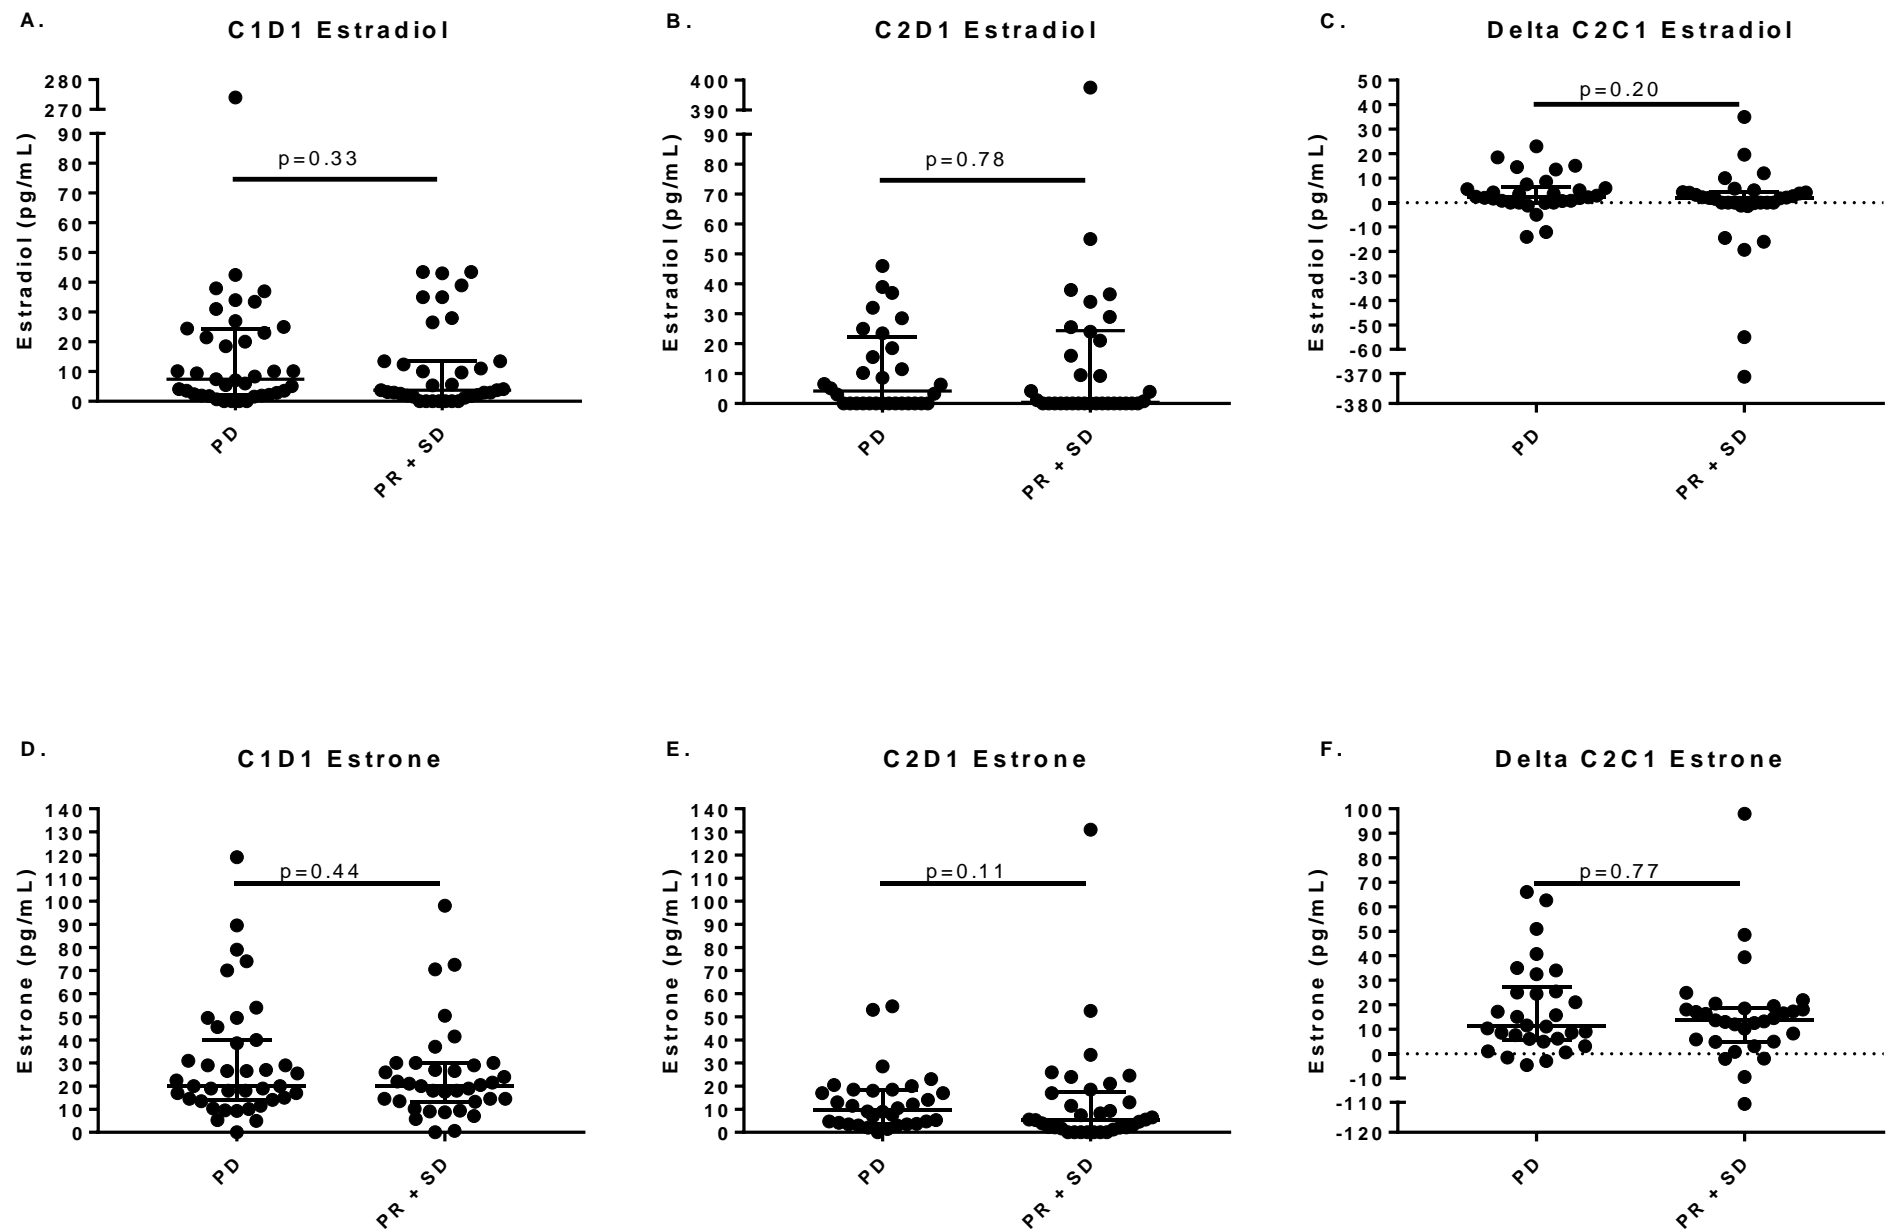

**Supplemental Figure 2.** Estradiol and estrone levels according to response. A,B) Estradiol levels at C1 and C2. C) Estradiol difference between C1 and C2. D,E) Estrone levels at C1 and C2. F) Estrone difference between C1 and C2. Estradiol and estrone levels were drawn on day 1 of each cycle. Duplicates were analyzed and the average was taken. Wilcoxon rank sum was used to evaluate differences between groups by response. Median and interquartile range are shown. PD: Progressive Disease; PR: Partial Response; SD: Stable Disease; C1D1: cycle 1 day 1.
