# Supplementary material
Source: PubMed Central journal article supplement (PMC6118115)
Supplement: NIHMS1500322-supplement-3.pdf [file NIHMS1500322-supplement-3.pdf]

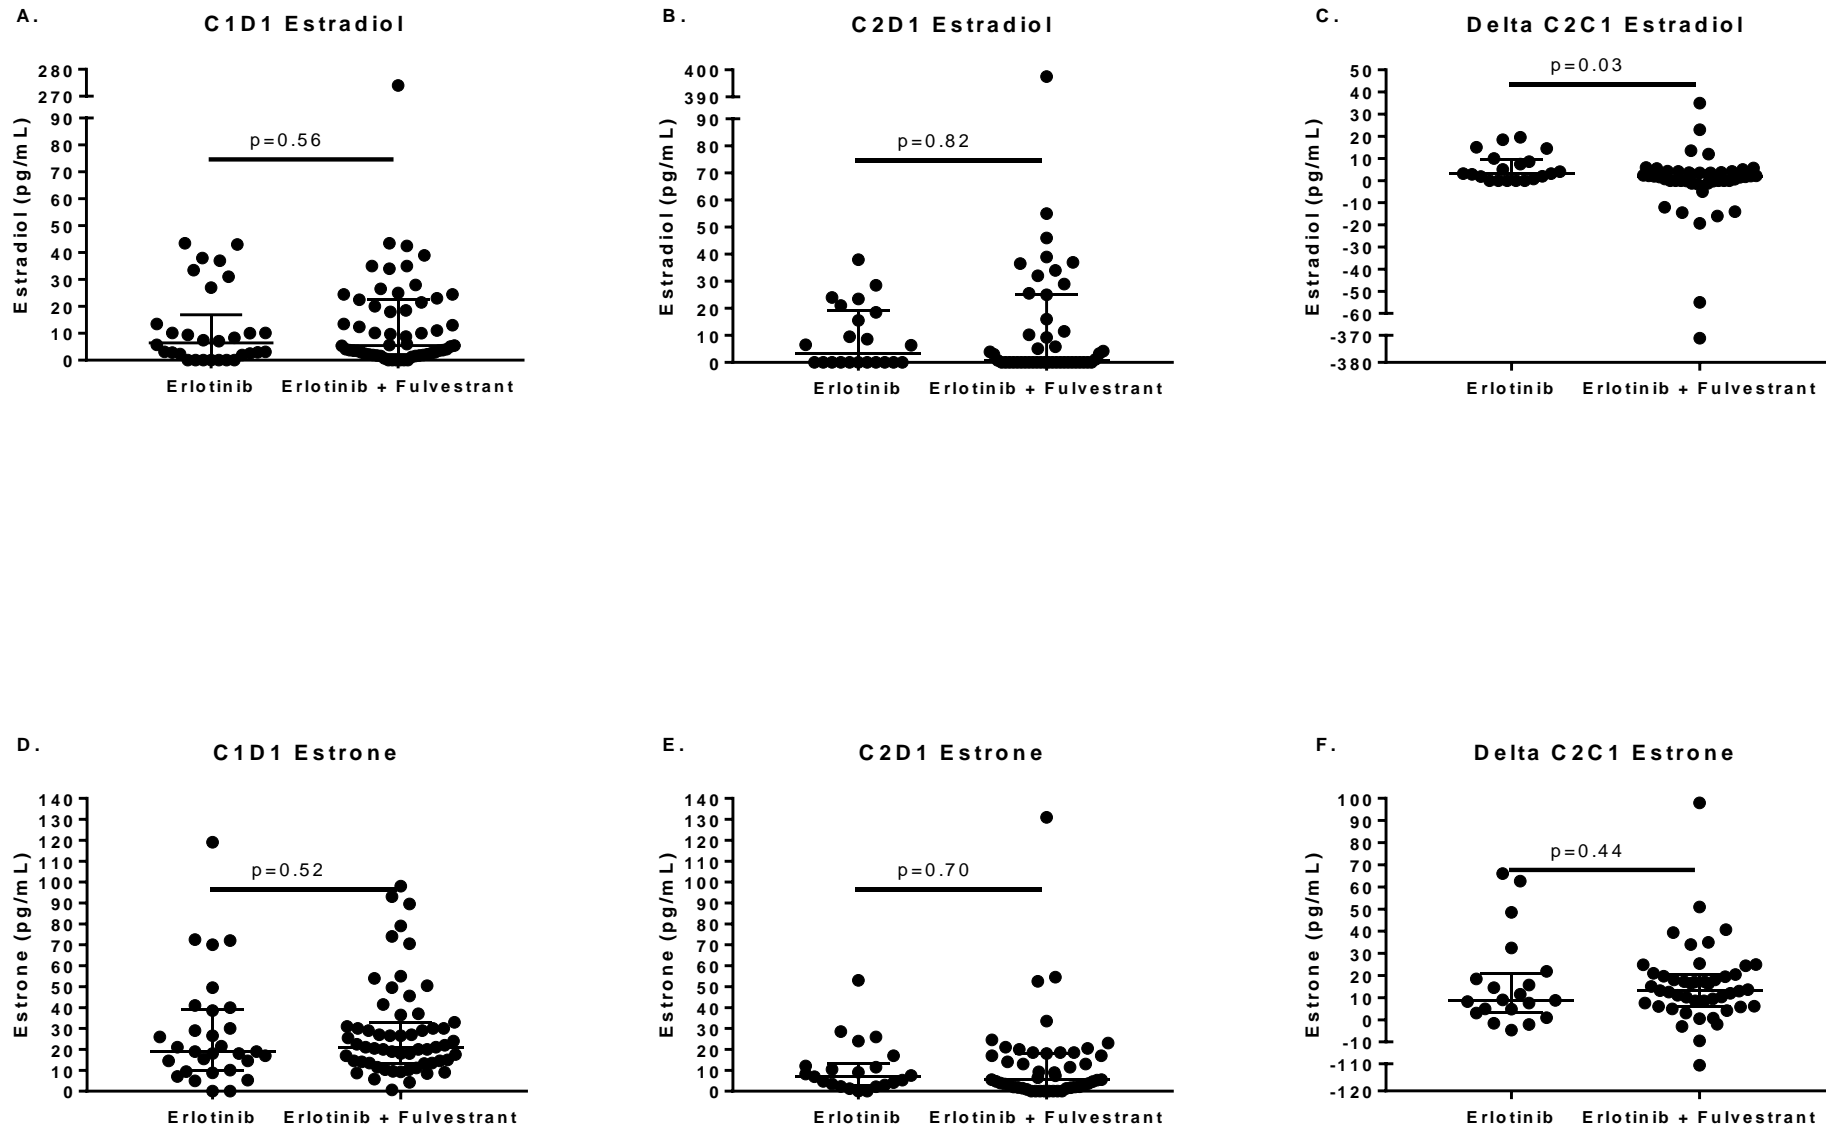

**Supplemental Figure 3.** Estradiol and estrone levels according to treatment arm. A,B) Estradiol levels at C1 and C2. C) Estradiol difference between C1 and C2. D,E) Estrone levels at C1 and C2. F) Estrone difference between C1 and C2. Estradiol and estrone levels were drawn on day 1 of each cycle. C1 and C2 levels are shown along with the difference in C1 and C2. Duplicates were analyzed and the average was taken. Wilcoxon rank sum was used to evaluate differences between groups by treatment arm. Median and interquartile range are shown. C1D1: cycle 1 day 1.
